# Supplementary material for: Pre-Treatment and Post-Treatment Dental Anxiety in Patients Visiting Intern Dental Clinic
Source: MDPI journal article supplement (doi:10.3390/medicina59071284), 2023-07-11
Supplement: s1 [file s1]

## **POST OPERATIVE QUESTIONNAIRE**

**1. How anxious are you feeling at the moment?**

- 1 = not anxious,
- 2 = slightly anxious
- 3 = fairly anxious
- 4 = very anxious
- 5 = extremely anxious

**2. What are the post treatment factors, which makes you more or less anxious during the appointment?**

- 1. Time length of appointment,
- 2. Clinical environment
- 3. Knowledge of additional appointment
- 4. None of the above

**3. Factors related to the Interns (Treating dentist), which makes you more or less anxious during the appointment?**

- 1. Interpersonal skills of Intern (effective interpersonal skills of interns reduced anxiety in patients)
- 2. Clinical ability of intern (awareness and ability of interns to dealt with anxiety patients reduces the dental anxiety)
- 3. Presence of supervisor (presence of supervisor with the interns during the procedure reduces the dental anxiety)
- 4. None of the above

**4. The type of treatment received during their first appointment with the interns?**

- 1. Periodontics
- 2. Operative
- 3. Prosthodontics
- 4. Endodontics
- 5. Oral Surgery

**5. Any other comments regarding the experience during and after treatment? Open ended question**
