# Supplementary material for: Pre-Treatment and Post-Treatment Dental Anxiety in Patients Visiting Intern Dental Clinic
Source: MDPI journal article supplement (doi:10.3390/medicina59071284), 2023-07-11
Supplement: s1 [file s1]

Part II: Modified Dental Anxiety Scale

**CAN YOU TELL US - HOW ANXIOUS YOU GET, IF AT ALL, WITH YOUR DENTAL VISIT?**

*Please indicate by inserting "X" in the appropriate box*

1. If you went to the dentist for TREATMENT TOMORROW, how would you feel?
  - ☐ Not Anxious
  - ☐ Slightly Anxious
  - ☐ Fairly Anxious
  - ☐ Very Anxious
  - ☐ Extremely Anxious
  
2. If you were sitting in the WAITING ROOM (waiting for treatment), how would you feel?
  - ☐ Not Anxious
  - ☐ Slightly Anxious
  - ☐ Fairly Anxious
  - ☐ Very Anxious
  - ☐ Extremely Anxious
  
3. If you were about to have a TOOTH DRILLED, how would you feel?
  - ☐ Not Anxious
  - ☐ Slightly Anxious
  - ☐ Fairly Anxious
  - ☐ Very Anxious
  - ☐ Extremely Anxious
  
4. If you were about to have your teeth SCALED AND POLISHED (teeth cleaning) , how would you feel?
  - ☐ Not Anxious
  - ☐ Slightly Anxious
  - ☐ Fairly Anxious
  - ☐ Very Anxious
  - ☐ Extremely Anxious
  
5. If you were to about to have LOCAL ANAESTHETIC INJECTION in your gum, above an upper back tooth, how would you feel?
  - ☐ Not Anxious
  - ☐ Slightly Anxious
  - ☐ Fairly Anxious
  - ☐ Very Anxious
  - ☐ Extremely Anxious
